# Supplementary material for: Isotope analyses to explore diet and mobility in a medieval Muslim population at Tauste (NE Spain)
Source: PLoS One. 2017 May 4;12(5):e0176572. doi: 10.1371/journal.pone.0176572 (PMC5417512; doi:10.1371/journal.pone.0176572)
Supplement: S4 Table — (XLSX) [file pone.0176572.s004.xlsx]

## Sheet: Hoja1
Samples	Species	%N	δ15N	%C	δ13C	C/N
T-FMA	Madrilla	15.25	12.91	42.44	-22.69	3.25
T-FB2	Comon barbel	15.89	12.76	44.25	-22.97	3.25
T-FB1	Comon barbel	15.64	12.69	43.08	-22.51	3.21
T-FMU1	Shrew	15.40	12.66	43.36	-15.99	3.29
T-FMU2	Shrew	16.19	14.46	45.29	-19.83	3.26
T-FMU3	Shrew	16.29	10.12	45.19	-21.54	3.24
T-FR1	Wood mouse	16.83	7.89	47.99	-19.41	3.33
T-FR2	Wood mouse	14.82	8.95	41.55	-17.91	3.27
T-FR3	Wood mouse	15.67	9.26	44.18	-17.92	3.29
